# Supplementary material
Source: PubMed Central journal article supplement (PMC6391553)
Supplement: DS_10.1177_1941738118816282.pdf [file DS_10.1177_1941738118816282.pdf]

## Appendix

Table A1. Search strategy

| <b>MEDLINE (n = 180)</b>                                                                                                                                                                                                                                                                                                                                      | <b>EMBASE (n = 583)</b>                                                                                                                                                                                                                                                                                                                                       | <b>PubMed (n = 541)</b>                                                                                                   |
|---------------------------------------------------------------------------------------------------------------------------------------------------------------------------------------------------------------------------------------------------------------------------------------------------------------------------------------------------------------|---------------------------------------------------------------------------------------------------------------------------------------------------------------------------------------------------------------------------------------------------------------------------------------------------------------------------------------------------------------|---------------------------------------------------------------------------------------------------------------------------|
| <p><b>Strategy:</b></p> <ol style="list-style-type: none"> <li>1. Ankle.mp.</li> <li>2. Sprain.mp.</li> <li>3. Syndesmosis.mp.</li> <li>4. Return to Sport.mp. or<br/>Return to Sport/</li> <li>5. Return to Play.mp.</li> <li>6. Athlete.mp. or<br/>Athletes/</li> <li>7. 2 or 3</li> <li>8. 4 or 5 or 6</li> <li>9. 7 and 8</li> <li>10. 1 and 9</li> </ol> | <p><b>Strategy:</b></p> <ol style="list-style-type: none"> <li>1. Ankle.mp.</li> <li>2. Sprain.mp.</li> <li>3. Syndesmosis.mp.</li> <li>4. Return to Sport.mp. or<br/>Return to Sport/</li> <li>5. Return to Play.mp.</li> <li>6. Athlete.mp. or<br/>Athletes/</li> <li>7. 2 or 3</li> <li>8. 4 or 5 or 6</li> <li>9. 7 and 8</li> <li>10. 1 and 9</li> </ol> | <p><b>Strategy:</b></p> <p>Ankle AND ((Sprain OR Syndesmosis) AND (Return to play<br/>OR return to sport OR athlete))</p> |
